# Supplementary material for: Plant-based polyphenol rich protein supplementation attenuated skeletal muscle loss and lowered the LDL level via gut microbiota remodeling in Taiwan's community-dwelling elderly
Source: Royal Society of Chemistry journal article supplement (doi:10.1039/d3fo02766j), 2023-01-01
Supplement: d3fo02766j2.pdf [file d3fo02766j2.pdf]

Supplementary Table 1. Nutrition Content of BKJ supplement

| Serving size 30 g       |      | Amount per serving |
|-------------------------|------|--------------------|
| 1 serving per container |      |                    |
| Calories                | Kcal | 95                 |
| Protein                 | g    | 8.1                |
| Fat                     | g    | 2.5                |
| saturated fat           | g    | 0.6                |
| trans fat               | g    | 0.0                |
| Carbohydrate            | g    | 9.9                |
| Sugar (Erythritol )     | g    | 2.1                |
| Sodium                  | mg   | 6                  |
| Isoflavone              | mg   | 9.4                |
| Aglycone                | mg   | 1.9                |
| Daidzein                | mg   | 1.11               |
| Glycitein               | mg   | 0.06               |
| Genistein               | mg   | 0.73               |
| $\beta$ -glucoside      | mg   | 25.4               |
| Daidzin                 | mg   | -                  |
| Glycitin                | mg   | -                  |
| Genistin                | mg   | 25.4               |
| Malonyl glucoside       | mg   | 2.0                |
| Daidzin                 | mg   | -                  |
| Glycitin                | mg   | -                  |
| Genistin                | mg   | 2.0                |
| Acetyl glucoside        | mg   | 4.9                |
| Daidzin                 | mg   | 1.7                |
| Glycitin                | mg   | -                  |
| Genistin                | mg   | 3.3                |

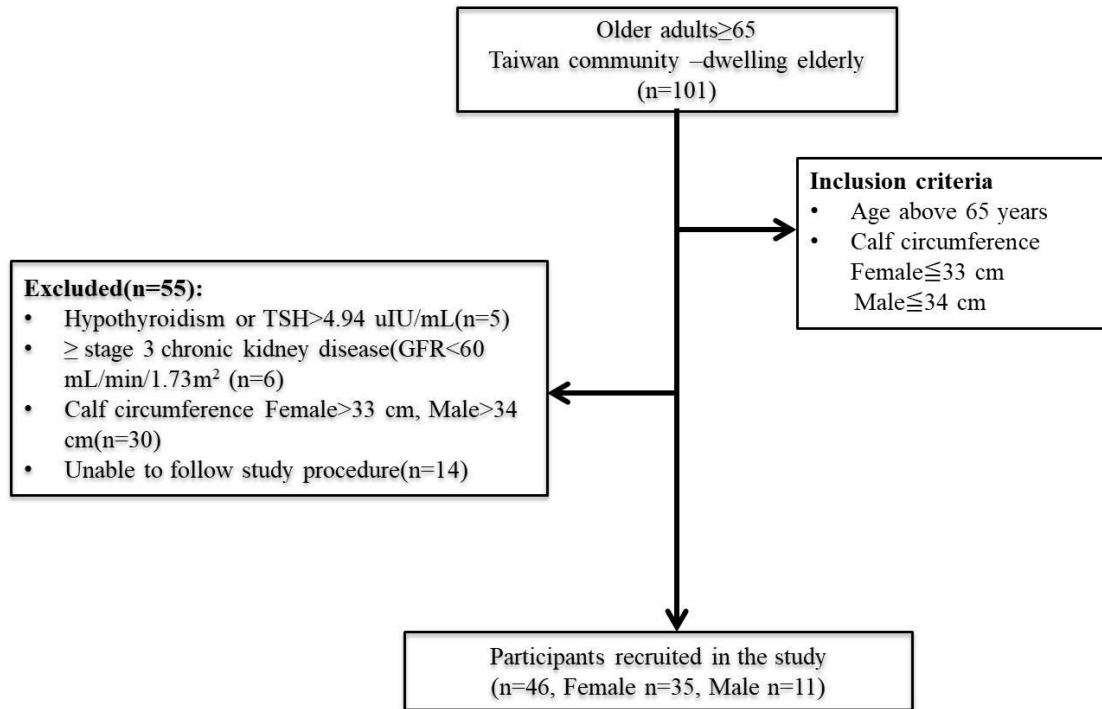

Supplementary Figure 1. Participant flow chart.
